# Supplementary material for: Differential regulation of antioxidant enzymes in Frankliniella occidentalis (Thysanoptera: Thripidae) exposed to thermal stress
Source: PeerJ. 2021 Aug 27;9:e12089. doi: 10.7717/peerj.12089 (PMC8404573; doi:10.7717/peerj.12089)
Supplement: Supplemental Information 1 [file peerj-09-12089-s001.xlsx]

## Sheet: Sheet1
Gene expression data at different treatment temperatures
gene name	treatment temperature	Cq-1	Cq-2
SOD	-10	27.9949	28.1374
		25.3007	25.5113
		24.1797	24.6026
		25.2076	25.5983
	-8	24.1649	24.3616
		24.0753	23.9284
		26.1122	26.1459
		24.0595	24.5307
	-6	24.1332	24.0292
		25.2777	25.6292
		24.016	24.8689
		24.129	24.2346
	-4	23.67	23.6523
		23.36	23.3702
		24.2825	24.3092
	-2	23.7087	23.7035
		25.0575	25.0491
		24.2871	24.4339
		22.8465	22.8284
	0	23.6866	23.7291
		23.7781	23.7658
		23.2184	23.2515
		24.0099	23.993
	26	24.2194	24.2155
		25.7109	25.7811
		24.5462	24.5518
		23.8295	23.7215
	31	24.536	25.0359
		23.7965	23.7295
		24.0332	23.9945
	33	24.3465	24.0387
		24.0936	24.0687
		24.1699	23.6093
		24.0728	23.566
	35	27.1261	26.8999
		24.2343	24.4318
		24.6492	24.4865
		23.7353	23.8608
	37	26.5213	26.5274
		25.2827	25.321
		24.6226	24.6368
		26.2826	26.2553
	39	25.7631	26.1934
		25.2728	25.4003
		24.2924	24.5878
		25.4008	25.0889
	41	24.8602	24.355
		24.2739	24.1942
		24.58	24.3067
		26.2379	26.0766
GST	-10	29.2791	29.0652
		27.7917	27.5579
		27.1038	27.4541
		29.3017	29.6685
	-8	27.7106	28.0102
		26.7244	27.021
		30.2488	30.2357
		27.4656	28.4489
	-6	28.093	28.3334
		28.7264	29.0313
		28.2914	28.3946
		28.9132	29.6062
	-4	28.0206	28.1221
		27.7549	27.7216
		28.2661	28.1522
	-2	27.1196	27.2264
		28.42	28.3402
		27.1184	27.0801
		26.4244	26.4015
	0	27.1546	27.0696
		26.409	26.3852
		26.8332	26.832
		27.0504	27.1463
	26	27.9608	27.9306
		29.0634	29.0687
		28.3588	28.3551
		27.224	27.2623
	31	35.7574	36.4573
		31.3984	31.1043
		35.5628	35.5044
	33	28.8636	29.0991
		28.3471	28.7064
		27.9302	28.4097
		28.0672	28.4746
	35	30.4683	30.2152
		28.265	28.2914
		28.5029	28.0689
		29.2766	29.2976
	37	27.2765	27.7983
		28.1261	28.6414
		27.9757	28.101
		26.9773	27.6648
	39	30.2948	30.3225
		29.6886	29.5335
		29.004	29.0867
		30.3576	30.0858
	41	29.0046	28.3002
		28.0418	28.112
		28.3265	28.0754
		29.3774	28.9146
POD	-10	35.2932	35.8283
		33.226	33.2442
		33.5443	33.5627
		34.3522	35.1976
	-8	35.3513	34.3216
		32.3356	32.6192
		35.3828	35.2651
		35.2814	34.9047
	-6	34.171	35.7748
		35.0279	35.1127
		35.6702	35.0798
		35.0339	35.4443
	-4	35.6133	35.9065
		30.106	30.3373
		36.0958	36.1262
	-2	32.3542	32.647
		32.822	32.6146
		33.8465	33.8275
		31.562	31.5249
	0	34.2938	34.1637
		33.1175	33.6478
		34.4861	34.2928
		34.1318	33.8657
	26	36.2601	36.1327
		36.2337	36.8153
		36.8249	37.4461
		35.1455	35.2
	31	35.7574	36.4573
		31.3984	31.1043
		35.5628	35.5044
	33	35.3331	35.6234
		33.6423	34.6301
		34.4012	33.5158
		33.0683	33.8187
	35	35.8149	35.5373
		36.662	36.191
		36.5568	36.1517
		36.5164	36.6252
	37	34.1068	34.5326
		34.5342	33.5597
		34.726	34.6558
		35.5367	36.0503
	39	37.1015	37.0269
		39.1749	36.6197
		34.8569	35.14
		38.0018	37.824
	41	36.2446	35.5478
		34.8323	35.6755
		36.1844	36.8276
		36.3233	37.634
18S	-10	10.0377	10.167
		9.00571	9.15003
		9.16686	9.28131
		10.2471	10.1525
	-8	8.13007	8.2426
		8.80618	8.50888
		9.10605	9.29991
		9.49903	9.48062
	-6	9.57785	9.15744
		9.72532	9.68511
		8.0832	8.44552
		7.95381	8.34068
	-4	9.14319	9.04483
		9.01622	9.04165
		9.06891	9.09702
	-2	9.29824	9.53023
		11.5239	11.5483
		10.5455	10.9371
		8.96338	8.9907
	0	8.76774	9.0187
		9.01645	9.47618
		8.92652	9.11067
		9.58194	9.06435
EF-1	-10	22.1286	22.2437
		20.8098	20.8187
		19.9448	20.2165
		22.3334	22.4333
	-8	20.3353	20.1637
		19.9201	20.0457
		21.1718	21.1182
		20.5096	20.5209
	-6	19.9817	19.9117
		20.91	21.0384
		20.018	19.9341
		20.4794	20.4807
	-4	23.8634	23.8411
		22.3834	22.4427
		24.3983	24.3208
	-2	19.9137	19.9442
		21.7829	21.9008
		20.8336	21.0395
		19.1001	19.1964
	0	20.9438	20.9475
		21.0425	21.0973
		20.8843	20.776
		19.7462	19.851
GAPDH	26	23.4703	23.5104
		23.6699	23.78
		24.6879	24.9191
	31	26.5754	27.1558
		22.2468	22.0045
		22.4491	22.435
	33	25.3454	25.1368
		22.9828	23.2122
		22.5741	22.0156
		23.0066	23.0818
	35	21.6179	21.7755
		20.4891	20.4667
		21.0296	21.2536
		20.9279	20.8255
	37	21.287	21.0635
		22.2268	21.5747
		22.7342	22.5343
		20.6018	21.0197
	39	26.3877	25.9212
		25.7192	25.229
		24.6044	24.1357
		27.1478	26.9911
	41	24.5119	24.3514
		22.0874	22.1376
		22.6956	22.7371
		24.2931	24.7569
RPL32	26	20.0992	19.9925
		19.9283	20.058
		19.8708	20.1078
		19.4258	19.5307
	31	20.098	21.0905
		20.6224	20.8733
		20.3693	20.2137
	33	20.4908	20.5122
		21.5784	21.2184
		19.247	20.7217
		19.4406	19.7602
	35	22.4063	22.0413
		19.2506	19.1706
		20.4678	20.1738
		20.0438	20.3698
	37	21.2192	21.7513
		19.9838	19.961
		19.7956	19.868
		20.735	20.5928
	39	22.0947	22.3621
		21.4042	21.5325
		20.733	20.7863
		21.3548	21.332
	41	20.0019	19.4537
		20.6349	19.8162
		19.8339	20.58
		20.2549	19.1323

## Sheet: Sheet2
Gene expression data at different exposure time
gene name	treatment temperature	exposure time	Cq-1	Cq-2
SOD	-4	0.5h	24.1695	23.9767
		0.5h	25.2393	25.2041
		0.5h	23.801	23.8152
		0.5h	24.0301	24.0095
		1h	23.67	23.6523
		1h	23.36	23.3702
		1h	24.2825	24.3092
		2h	24.0951	24.1325
		2h	24.1654	24.1427
		2h	24.3684	24.3832
		2h	24.0325	24.0202
	35	0.5h	24.2492	24.1552
		0.5h	23.906	23.8823
		0.5h	23.567	23.5748
		0.5h	23.6424	23.6387
		1h	24.8197	24.957
		1h	30.4949	30.1322
		1h	23.4681	23.4538
		2h	24.7446	24.7454
		2h	24.1836	24.1782
		2h	23.771	23.8506
		2h	23.9125	23.9399
GST	-4	0.5h	28.0276	28.0918
		0.5h	29.2567	29.2606
		0.5h	27.8162	27.7751
		0.5h	27.5261	27.4493
		1h	28.0206	28.1221
		1h	27.7549	27.7216
		1h	28.2661	28.1522
		2h	27.2778	27.3689
		2h	26.4722	26.4294
		2h	26.1859	26.5574
		2h	27.6288	27.7627
	35	0.5h	28.1045	28.0375
		0.5h	28.0189	27.7178
		0.5h	27.5551	27.3513
		0.5h	27.5411	27.792
		1h	29.1956	29.3951
		1h	35.738	35.4
		1h	28.0605	28.0415
		2h	26.6878	26.7918
		2h	26.6762	27.0311
		2h	27.3469	27.3975
		2h	28.0044	27.9995
POD	-4	0.5h	34.5163	34.3262
		0.5h	34.0051	34.3063
		0.5h	36.3325	36.4407
		0.5h	34.9039	34.9692
		1h	35.6133	35.9065
		1h	30.106	30.3373
		1h	36.0958	36.1262
		2h	35.1535	35.1437
		2h	36.3838	35.379
		2h	34.8549	35.0819
		2h	34.6232	34.5052
	35	0.5h	34.0418	33.8961
		0.5h	32.7586	32.6451
		0.5h	34.2962	33.9008
		0.5h	34.3104	34.0824
		1h	37.353	36.9614
		1h	33.2798	33.0289
		1h	37.7572	37.8107
		2h	33.9798	33.8193
		2h	33.0275	33.0055
		2h	32.8182	33.4247
		2h	33.4088	33.03
EF-1	-4	0.5h	20.6479	20.5714
		0.5h	24.3364	24.3226
		0.5h	21.1189	21.1204
		0.5h	20.9548	20.8985
		1h	23.8634	23.8411
		1h	22.3834	22.4427
		1h	24.3983	24.3208
		2h	20.9034	20.8643
		2h	20.5052	20.5644
		2h	20.6237	20.7483
		2h	20.7799	20.8208
GAPDH	35	0.5h	22.0149	22.0658
		0.5h	21.4744	21.5388
		0.5h	22.0307	22.0085
		0.5h	21.9405	21.907
		1h	24.6178	24.7488
		1h	24.8992	25.0808
		1h	24.4459	24.2505
		2h	23.0755	23.1137
		2h	22.1781	22.3411
		2h	21.3463	21.4754
		2h	22.1367	22.1876
18S	-4	0.5h	9.20117	9.44359
		0.5h	12.7555	13.3797
		0.5h	10.4065	10.6672
		0.5h	9.25189	9.52329
		1h	9.14319	9.04483
		1h	9.01622	9.04165
		1h	9.06891	9.09702
		2h	9.34585	9.76585
		2h	9.37245	9.48062
		2h	10.0525	10.2395
		2h	9.10665	9.38026
RPL32	35	0.5h	22.5785	22.7299
		0.5h	21.8572	22.2189
		0.5h	20.8825	21.5123
		0.5h	21.9155	21.8182
		1h	22.4063	22.0413
		1h	19.2506	19.1706
		1h	20.4678	20.1738
		1h	20.0438	20.3698
		2h	22.9693	23.2154
		2h	21.6608	22.0413
		2h	21.6126	22.078
		2h	22.653	22.603
