# Supplementary material for: Differential regulation of antioxidant enzymes in Frankliniella occidentalis (Thysanoptera: Thripidae) exposed to thermal stress
Source: PeerJ. 2021 Aug 27;9:e12089. doi: 10.7717/peerj.12089 (PMC8404573; doi:10.7717/peerj.12089)
Supplement: Supplemental Information 2 [file peerj-09-12089-s002.xlsx]

## Sheet: Sheet1
enzymatic activity data at different treatment temperatures
		1	2	3	4	5	6	7	8	9	10	11	12
SOD	26℃	0.166	0.162	0.164	0.118	0.119	0.118	0.118	0.121	0.124	0.104	0.104	0.104
	31℃	0.162	0.156	0.159	0.138	0.139	0.138	0.132	0.13	0.141	0.152	0.151	0.151
	33℃	0.205	0.197	0.204	0.164	0.165	0.164	0.159	0.157	0.161	0.155	0.157	0.156
	35℃	0.32	0.313	0.325	0.152	0.151	0.158	0.164	0.162	0.165	0.163	0.162	0.162
	37℃	0.13	0.131	0.132	0.159	0.158	0.158	0.168	0.167	0.173	0.158	0.15	0.15
	39℃	0.14	0.136	0.138	0.127	0.127	0.128	0.133	0.133	0.132	0.127	0.125	0.128
	41℃	0.151	0.15	0.151	0.115	0.117	0.122	0.14	0.138	0.137	0.118	0.118	0.122
POD	26℃	0.104	0.105	0.105	0.107	0.108	0.107	0.098	0.097	0.096	0.101	0.099	0.097
	31℃	0.15	0.15	0.149	0.154	0.154	0.154	0.162	0.158	0.159	0.151	0.157	0.15
	33℃	0.131	0.132	0.128	0.131	0.133	0.13	0.129	0.131	0.13	0.131	0.132	0.131
	35℃	0.154	0.147	0.149	0.148	0.139	0.14	0.155	0.154	0.15	0.158	0.159	0.163
	37℃	0.13	0.124	0.128	0.155	0.149	0.148	0.136	0.137	0.137	0.155	0.154	0.151
	39℃	0.123	0.126	0.119	0.12	0.117	0.118	0.129	0.124	0.126	0.124	0.114	0.119
	41℃	0.162	0.162	0.16	0.196	0.202	0.195	0.183	0.179	0.178	0.217	0.215	0.211
GST	26℃	1.234	1.285	1.269	1.191	1.189	1.33	1.233	1.215	1.176	1.221	1.238	1.216
	31℃	1.075	1.101	1.095	1.149	1.1	1.152	0.984	1.026	0.971	1.065	1.048	1.014
	33℃	0.886	0.936	0.907	0.973	0.926	1.076	1.018	0.957	1.015	1.181	0.945	0.995
	35℃	1.686	1.753	1.408	1.412	1.503	1.318	1.446	1.589	1.463	1.207	1.269	1.46
	37℃	1.303	1.404	1.363	1.354	1.292	1.216	1.356	1.336	1.26	1.236	1.337	1.257
	39℃	1.166	1.261	1.286	1.248	1.296	1.038	0.949	1.089	1.03	1.045	1.039	1.028
	41℃	1.019	1.049	1.018	0.924	1.047	1.007	1.111	1.129	1.131	1.015	1.144	1.164

## Sheet: Sheet2
enzymatic activity data at different exposure time
		1	2	3	4	5	6	7	8	9	10	11	12
SOD	0.5h	0.156	0.157	0.159	0.146	0.148	0.147	0.147	0.147	0.148	0.155	0.157	0.158
	1h	0.32	0.313	0.325	0.152	0.151	0.158	0.164	0.162	0.165	0.163	0.162	0.162
	2h	0.146	0.147	0.144	0.16	0.157	0.158	0.152	0.153	0.152	0.142	0.148	0.137
POD	0.5h	0.156	0.154	0.157	0.136	0.135	0.134	0.148	0.15	0.147	0.16	0.159	0.162
	1h	0.154	0.147	0.149	0.148	0.139	0.14	0.155	0.154	0.15	0.158	0.159	0.163
	2h	0.135	0.13	0.132	0.168	0.168	0.168	0.139	0.14	0.138	0.145	0.145	0.145
GST	0.5h	1.724	1.637	1.819	1.714	1.723	1.896	1.768	1.822	1.85	1.821	1.377	1.585
	1h	1.686	1.753	1.408	1.412	1.503	1.318	1.446	1.589	1.463	1.207	1.269	1.46
	2h	1.358	1.31	1.379	1.268	1.156	1.174	1.37	1.257	1.315	1.392	1.324	1.187
