# Supplementary material for: Differential regulation of antioxidant enzymes in Frankliniella occidentalis (Thysanoptera: Thripidae) exposed to thermal stress
Source: PeerJ. 2021 Aug 27;9:e12089. doi: 10.7717/peerj.12089 (PMC8404573; doi:10.7717/peerj.12089)
Supplement: Supplemental Information 4 [file peerj-09-12089-s004.xlsx]

## Sheet: Sheet1
Description	Scientific Name	Max Score	Total Score	Query Cover	E value	Per. Ident	Acc. Len	Accession
PREDICTED: Frankliniella occidentalis glutathione S-transferase 1-1-like (LOC113208577), mRNA	Frankliniella occidentalis	1682	1682	1	0	0.9968	1210	XM_026425672.1
PREDICTED: Thrips palmi glutathione S-transferase 1-like (LOC117650872), mRNA	Thrips palmi	211	211	0.58	2e-49	0.687	2760	XM_034394489.1
PREDICTED: Pollicipes pollicipes glutathione S-transferase 1-like (LOC119097581), mRNA	Pollicipes pollicipes	118	118	0.18	1e-21	0.7407	1180	XM_037220625.1
PREDICTED: Pollicipes pollicipes glutathione S-transferase 1-like (LOC119096732), mRNA	Pollicipes pollicipes	118	118	0.18	1e-21	0.7407	987	XM_037219643.1
Culex quinquefasciatus glutathione S-transferase 1 (LOC6052512), mRNA	Culex quinquefasciatus	92.4	92.4	0.18	1e-13	0.7104	836	XM_001868737.2
PREDICTED: Culex pipiens pallens glutathione S-transferase 1-like (LOC120422449), mRNA	Culex pipiens pallens	87.8	87.8	0.18	2e-12	0.7049	864	XM_039585896.1
PREDICTED: Drosophila sechellia glutathione S-transferase 1-1 (LOC6614209), transcript variant X2, mRNA	Drosophila sechellia	68.9	68.9	0.08	2e-06	0.7927	1124	XM_002038618.2
PREDICTED: Drosophila sechellia glutathione S-transferase 1-1 (LOC6614209), transcript variant X1, mRNA	Drosophila sechellia	68.9	68.9	0.08	2e-06	0.7927	3783	XM_032720754.1
PREDICTED: Petromyzon marinus glutathione S-transferase 1-like (LOC116948110), mRNA	Petromyzon marinus	67.1	67.1	0.15	5e-06	0.7059	1319	XM_032964467.1
PREDICTED: Megalopta genalis glutathione S-transferase 1-1-like (LOC117229316), transcript variant X2, mRNA	Megalopta genalis	66.2	66.2	0.15	5e-06	0.6943	1371	XM_033485734.1
PREDICTED: Megalopta genalis glutathione S-transferase 1-1-like (LOC117229316), transcript variant X1, mRNA	Megalopta genalis	66.2	66.2	0.15	5e-06	0.6943	1337	XM_033485733.1
Bemisia tabaci isolate MED-Q1 glutathione S-transferase D4 mRNA, complete cds	Bemisia tabaci	66.2	66.2	0.08	5e-06	0.7674	681	MN187116.1
Bemisia tabaci isolate Q glutathione S-transferase d6 mRNA, complete cds	Bemisia tabaci	66.2	66.2	0.08	5e-06	0.7674	681	MF036043.1
Bemisia tabaci isolate MEAM1 glutathione S-transferase D4 mRNA, complete cds	Bemisia tabaci	64.4	64.4	0.07	2e-05	0.775	681	MN187120.1
PREDICTED: Athalia rosae glutathione S-transferase 1-like (LOC105687486), mRNA	Athalia rosae	64.4	64.4	0.09	2e-05	0.75	1249	XM_012403160.3
Bemisia tabaci isolate B glutathione S-transferase d6 mRNA, complete cds	Bemisia tabaci	64.4	64.4	0.07	2e-05	0.775	681	MF036020.1
PREDICTED: Bemisia tabaci uncharacterized LOC109040635 (LOC109040635), mRNA	Bemisia tabaci	64.4	64.4	0.07	2e-05	0.775	1817	XM_019056615.1
Drosophila melanogaster GST-containing FLYWCH zinc-finger protein (gfzf), transcript variant E, mRNA	Drosophila melanogaster	64.4	64.4	0.11	2e-05	0.7321	3608	NM_001275406.1
Drosophila melanogaster GST-containing FLYWCH zinc-finger protein (gfzf), transcript variant D, mRNA	Drosophila melanogaster	64.4	64.4	0.11	2e-05	0.7321	1200	NM_001014609.3
Drosophila melanogaster GST-containing FLYWCH zinc-finger protein (gfzf), transcript variant B, mRNA	Drosophila melanogaster	64.4	64.4	0.11	2e-05	0.7321	3910	NM_001014610.2
Drosophila melanogaster GST-containing FLYWCH zinc-finger protein mRNA, complete cds	Drosophila melanogaster	64.4	64.4	0.11	2e-05	0.7321	3447	AY545463.1
Drosophila melanogaster RE40740 full insert cDNA	Drosophila melanogaster	64.4	64.4	0.11	2e-05	0.7321	1219	BT012465.1
Drosophila melanogaster LD30165 full insert cDNA	Drosophila melanogaster	64.4	64.4	0.11	2e-05	0.7321	3607	BT011060.1
PREDICTED: Formica exsecta glutathione S-transferase 1-1-like (LOC115236721), mRNA	Formica exsecta	62.6	62.6	0.09	7e-05	0.7374	1333	XM_029809352.1
Bemisia tabaci isolate SSA1-SG3 glutathione S-transferase D12 mRNA, complete cds	Bemisia tabaci	60.8	60.8	0.12	0.0002	0.7031	897	MN187087.1
PREDICTED: Orussus abietinus glutathione S-transferase 1-1 (LOC105701276), mRNA	Orussus abietinus	60.8	60.8	0.04	0.0002	0.875	1187	XM_012427897.2
PREDICTED: Drosophila mauritiana glutathione S-transferase 1-1 (LOC117146092), transcript variant X2, mRNA	Drosophila mauritiana	59.9	59.9	0.08	0.0008	0.7683	1324	XM_033312063.1
PREDICTED: Drosophila mauritiana glutathione S-transferase 1-1 (LOC117146092), transcript variant X1, mRNA	Drosophila mauritiana	59.9	59.9	0.08	0.0008	0.7683	3954	XM_033312062.1
PREDICTED: Drosophila erecta glutathione S-transferase 1-1 (LOC6553013), transcript variant X3, mRNA	Drosophila erecta	59.9	59.9	0.08	0.0008	0.7683	1353	XM_026980793.1
PREDICTED: Drosophila erecta glutathione S-transferase 1-1 (LOC6553013), transcript variant X2, mRNA	Drosophila erecta	59.9	59.9	0.08	0.0008	0.7683	1355	XM_026980771.1
PREDICTED: Drosophila erecta glutathione S-transferase 1-1 (LOC6553013), transcript variant X1, mRNA	Drosophila erecta	59.9	59.9	0.08	0.0008	0.7683	4081	XM_001979118.3
PREDICTED: Drosophila simulans glutathione S-transferase 1-1 (LOC6727052), transcript variant X3, mRNA	Drosophila simulans	59.9	59.9	0.08	0.0008	0.7683	868	XM_039295756.1
PREDICTED: Drosophila simulans glutathione S-transferase 1-1 (LOC6727052), transcript variant X2, mRNA	Drosophila simulans	59.9	59.9	0.08	0.0008	0.7683	946	XM_039295755.1
PREDICTED: Drosophila simulans glutathione S-transferase 1-1 (LOC6727052), transcript variant X1, mRNA	Drosophila simulans	59.9	59.9	0.08	0.0008	0.7683	3611	XM_002102413.3
Drosophila melanogaster clone BACR03E11, complete sequence	Drosophila melanogaster	59.9	59.9	0.08	0.0008	0.7683	174123	AC008225.4
PREDICTED: Eufriesea mexicana glutathione S-transferase 1-like (LOC108548000), transcript variant X2, mRNA	Eufriesea mexicana	59	59	0.08	0.0008	0.7471	768	XM_017900753.1
PREDICTED: Eufriesea mexicana glutathione S-transferase 1-like (LOC108548000), transcript variant X1, mRNA	Eufriesea mexicana	59	59	0.08	0.0008	0.7471	884	XM_017900752.1
Pseudogulbenkiania sp. NH8B DNA, complete genome	Pseudogulbenkiania sp. NH8B	59	59	0.12	0.0008	0.7143	4332995	AP012224.1
Bemisia tabaci isolate MEAM1 glutathione S-transferase D12 mRNA, complete cds	Bemisia tabaci	56.3	56.3	0.12	0.01	0.6953	900	MN187088.1
Bemisia tabaci isolate B glutathione S-transferase d1 mRNA, complete cds	Bemisia tabaci	56.3	56.3	0.12	0.01	0.6953	894	MF036015.1
PREDICTED: Bemisia tabaci maltase 2-like (LOC109033525), transcript variant X2, mRNA	Bemisia tabaci	56.3	56.3	0.12	0.01	0.6953	2647	XM_019046189.1
PREDICTED: Bemisia tabaci maltase 2-like (LOC109033525), transcript variant X1, mRNA	Bemisia tabaci	56.3	56.3	0.12	0.01	0.6953	2955	XM_019046188.1
PREDICTED: Bemisia tabaci uncharacterized LOC109040643 (LOC109040643), mRNA	Bemisia tabaci	56.3	56.3	0.07	0.01	0.7564	2043	XM_019056630.1
Syritta pipiens genome assembly, chromosome: 3	Syritta pipiens	56.3	56.3	0.08	0.01	0.747	58929916	LR994573.1
Stella sp. ATCC 35155 DNA, complete genome	Stella sp. ATCC 35155	55.4	55.4	0.07	0.01	0.7808	5339096	AP019701.1
Paracyclopina nana glutathione S-transferase delta-epsilon 2 mRNA, partial cds	Paracyclopina nana	54.5	54.5	0.04	0.035	0.8511	663	KF516606.1
Mamestra brassicae genome assembly, chromosome: 19	Mamestra brassicae	54.5	54.5	0.09	0.035	0.734	18536389	LR991006.1
PREDICTED: Belonocnema treatae uncharacterized LOC117170828 (LOC117170828), mRNA	Belonocnema treatae	53.6	53.6	0.07	0.035	0.7568	1501	XM_033357872.1
Bemisia tabaci isolate Australia glutathione S-transferase D6 mRNA, complete cds	Bemisia tabaci	53.6	53.6	0.15	0.035	0.6795	648	MN187129.1
Aeromicrobium sp. A1-2 chromosome, complete genome	Aeromicrobium sp. A1-2	53.6	53.6	0.06	0.035	0.7937	3446585	CP027482.1
Spodoptera exigua glutathione S-transferase epsilon 6 (GSTe6) mRNA, complete cds	Spodoptera exigua	53.6	53.6	0.1	0.035	0.7115	682	KY411931.1
